# Supplementary material for: Photo-activity and low resistivity in N/Nb Co-doped TiO2 thin films by combinatorial AACVD
Source: Royal Society of Chemistry journal article supplement (doi:10.1039/c5ta07922e), 2015-11-26
Supplement: c5ta07922e1.pdf [file c5ta07922e1.pdf]

# Photo-Activity and Low Resistivity in N/Nb Co-doped TiO<sub>2</sub> Thin Films by Combinatorial AACVD.

---

*Nicholas P. Chadwick,<sup>1,2</sup> Emily Glover,<sup>1</sup> Sanjayan Sathasivam,<sup>1,2</sup> Sulaiman N. Basahel,<sup>3,4</sup> Shaeel  
A. Althabaiti,<sup>3,4</sup> Abdulrahman O. Alyoubi,<sup>3,4</sup> Ivan P. Parkin<sup>1</sup> and Claire J. Carmalt<sup>1</sup>*

*1- Materials Research Centre, UCL Chemistry Department, 20 Gordon Street, London, WC1H 0AJ*

*2- Bio-Nano Consulting, The Gridiron Building, One Pancras Square, London, N1C 4AG*

*3 - Chemistry Department, King Abdulaziz University, Saudi Arabia*

*4 - Surface Chemistry and Catalytic Studies Group, King Abdulaziz University, Saudi Arabia*

## Electronic Supplementary Information

Transmission Data (Figure S1):

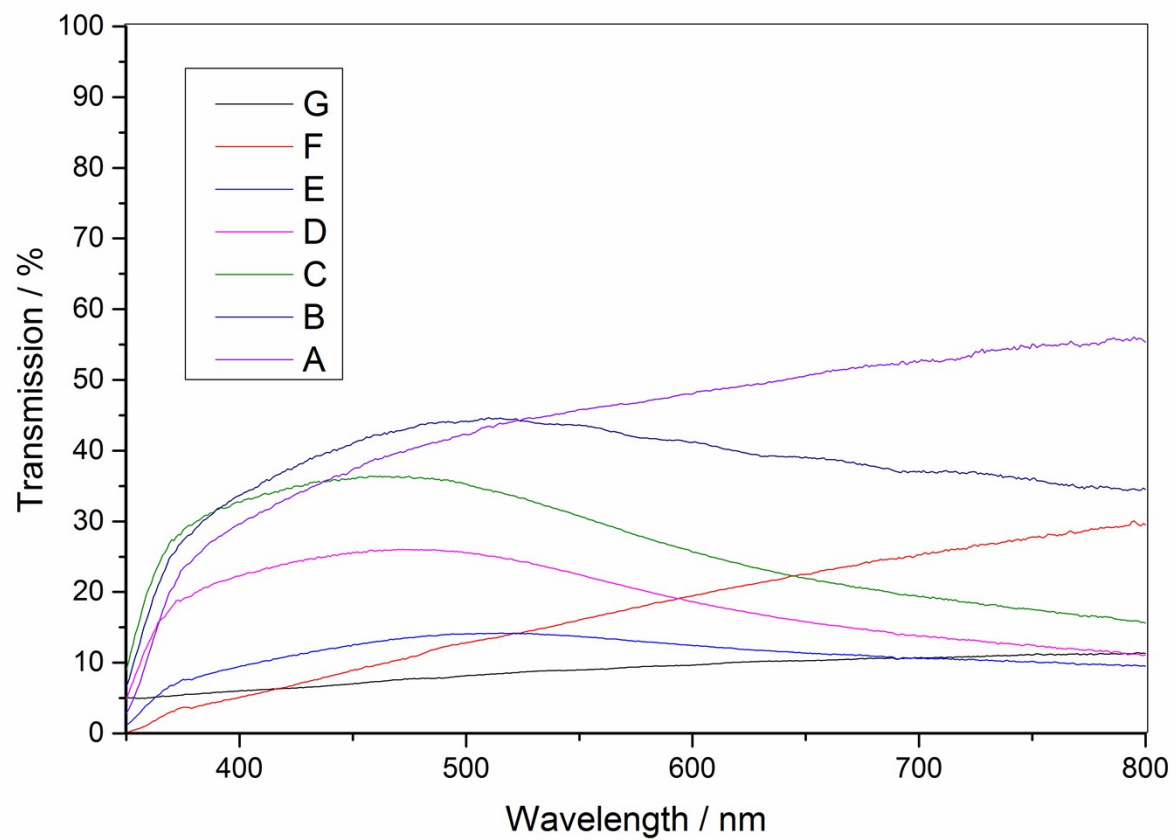

Figure S1: Transmissions data for grid positions A-G.
